# Supplementary material for: Evaluation of Anticancer Activity of 76 Plant Species Collected in Andalusia (Spain) against Lung Cancer Cells
Source: MDPI journal article supplement (doi:10.3390/plants12183275), 2023-09-15
Supplement: s1 [file s1]

# Evaluation of Anticancer Activity of 76 Plant Species Collected in Andalusia (Spain) Against Lung Cancer Cells

Víctor Jiménez-González <sup>1,\*</sup>, Guillermo Benítez <sup>2</sup>, Julio Enrique Pastor <sup>3</sup>, Miguel López-Lázaro <sup>1</sup> and José Manuel Calderón-Montaño <sup>1,\*</sup>

<sup>1</sup> Department of Pharmacology, Faculty of Pharmacy, University of Seville, 41012 Seville, Spain; mlopezlazaro@us.es

<sup>2</sup> Department of Botany, Faculty of Pharmacy, University of Granada, 18071 Granada, Spain; gbcruz@ugr.es

<sup>3</sup> Department of Vegetal Biology and Ecology, Faculty of Biology, University of Seville, 41012 Seville, Spain; jpastor@us.es

\* Correspondence: vjimenez3@us.es (V.J.-G.); jcalderon@us.es (J.M.C.-M.)

## Supplementary Materials

**Table S1.** Collection coordinates of plants used in this work.

| Extract | Plant name                                                               | Coordinates              |
|---------|--------------------------------------------------------------------------|--------------------------|
| 1       | <i>Acoelorrhaphe wrightii</i> (Griseb. & H.Wendl.)<br>H.Wendl. ex Becc.* | 37°25'27" N 5°59'42" W   |
| 2       | <i>Aegilops geniculata</i> Roth                                          | 37°43'59" N 6°10'13" W   |
| 3       | <i>Alkanna tinctoria</i> (L.) Tausch                                     | 37°20'25" N 5°46'56" W   |
| 4       | <i>Alyssum simplex</i> Rudolphi                                          | 37°19'11" N 5°46'20" W   |
| 5       | <i>Amaryllis belladonna</i> L.*                                          | 37°30'55" N 6°23'28" W   |
| 6       | <i>Arisarum simorrhinum</i> Durieu                                       | 37°34'24" N 6° 3' 38" W  |
| 7       | <i>Aristolochia paucineris</i> Pomel                                     | 37°21'10" N 5°47'50" W   |
| 8       | <i>Arum italicum</i> Mill. subsp. <i>italicum</i>                        | 37° 34' 6" N 6° 3' 14" W |
| 9       | <i>Bartsia trixago</i> L.                                                | 37°41'13" N 6°18'54" W   |
| 10      | <i>Bolboschoenus maritimus</i> (L.) Palla                                | 37°19'15.5"N 6°02'25.1"W |
| 11      | <i>Brachychiton populneus</i> R.Br.*                                     | 37°25'22" N 5°59'47" W   |
| 12      | <i>Briza maxima</i> L.                                                   | 37°41'14" N 6°18'19" W   |
| 13      | <i>Butia capitata</i> (Mart.) Becc.*                                     | 37°25'27" N 5°59'41" W   |
| 14      | <i>Catalpa bignonioides</i> Walter*                                      | 37°25'24" N 5°59'34" W   |
| 15      | <i>Ceiba speciosa</i> (A.St.-Hil.) Ravenna*                              | 37°25'22" N 5°59'49" W   |
| 16-17   | <i>Celtis australis</i> L.                                               | 37°20'29" N 5°46'43" W   |
| 18      | <i>Centranthus calcitrapae</i> (L.) Dufr.                                | 37°47'0" N 6°13'26" W    |
| 19      | <i>Cerinthe major</i> L.                                                 | 37°22'33" N 6°13'7" W    |
| 20      | <i>Ceterach officinarum</i> Willd. subsp. <i>officinarum</i>             | 37°34'17" N 6°3'20" W    |
| 21-22   | <i>Chamaerops humilis</i> L.                                             | 37°16'55" N 6°23'1" W    |
| 23      | <i>Cuscuta campestris</i> Yunck.                                         | 37°25'50.6"N 5°57'39.3"W |
| 24      | <i>Dipcadi serotinum</i> (L.) Medik.                                     | 37°16'21"N 6°23'52"W     |
| 25      | <i>Fedia cornucopiae</i> (L.) Gaertn.                                    | 37°23'13" N 6°13'30" W   |

| Extract | Plant name                                                                                   | Coordinates              |
|---------|----------------------------------------------------------------------------------------------|--------------------------|
| 26      | <i>Firmiana simplex</i> (L.) W.Wight*                                                        | 37°25'24" N 5°59'36" W   |
| 27-28   | <i>Gynandris sisyrinchium</i> (L.) Parl.                                                     | 37°19'49"N 5°47'37"W     |
| 29      | <i>Heliotropium europaeum</i> L.                                                             | 37°19'7" N 5°46'2" W     |
| 30      | <i>Iris germanica</i> L.                                                                     | 37°30'55" N 6°23'28" W   |
| 31      | <i>Jacaranda mimosifolia</i> D.Don*                                                          | 37°24'54.8"N 6°00'18.7"W |
| 32-33   | <i>Jasminum fruticans</i> L.                                                                 | 37°17'29" N 6°7'39" W    |
| 34      | <i>Juncus acutus</i> L. subsp. <i>acutus</i>                                                 | 37°22'27" N 5°44'51" W   |
| 35      | <i>Juno planifolia</i> (Mill.) Asch.                                                         | 37°23'45.6"N 6°13'46.2"W |
| 36      | <i>Koelreuteria paniculata</i> Laxm.*                                                        | 37°25'25" N 5°59'43" W   |
| 37      | <i>Lagerstroemia indica</i> L.*                                                              | 37°25'22" N 5° 59' 38" W |
| 38      | <i>Lagerstroemia speciosa</i> (L.) Pers.*                                                    | 37°25'24" N 5°59'38" W   |
| 39      | <i>Lagunaria patersonia</i> (Andrews) G. Don*                                                | 37°25'24" N 5°59'36" W   |
| 40      | <i>Linaria viscosa</i> (L.) Chaz.                                                            | 37°22'16" N 6°13'21" W   |
| 41      | <i>Liquidambar styraciflua</i> L.*                                                           | 37°25'24" N 5°59'34" W   |
| 42      | <i>Lolium rigidum</i> Gaudin                                                                 | 37°18'21" N 6°2'32" W    |
| 43      | <i>Lomelosia simplex</i> (Desf.) Raf. subsp. <i>dentata</i> (Jord. & Fourr.) Greuter & Burde | 37°16'34" N 6°23'26" W   |
| 44      | <i>Lonicera implexa</i> Aiton                                                                | 37°30'12" N 6°23'41" W   |
| 45      | <i>Maclura pomifera</i> (Raf.) C.K.Schneid.*                                                 | 37°25'20" N 5°59'39" W   |
| 46-47   | <i>Mandragora autumnalis</i> Bertol.                                                         | 37°22'40"N 6°10'30" W    |
| 48      | <i>Morus nigra</i> L.                                                                        | 37°19'04.6"N 6°02'48.4"W |
| 49      | <i>Muscari comosum</i> (L.) Mill.                                                            | 37°39'28" N 6°13'31" W   |
| 50      | <i>Nonea vesicaria</i> (L.) Rchb.                                                            | 37°22'45" N 6°13'33" W   |
| 51      | <i>Oenothera rosea</i> L'Hér. ex Aiton*                                                      | 37°25'21" N 5°59'40" W   |
| 52      | <i>Ophrys scolopax</i> Cav.                                                                  | 37°21'10" N 5°47'50" W   |
| 53      | <i>Ophrys speculum</i> Link                                                                  | 37°20'16" N 5°47'14" W   |
| 54      | <i>Ornithogalum baeticum</i> Boiss.*                                                         | 37°21'10" N 5°47'50" W   |
| 55      | <i>Orobanche crenata</i> Forssk.                                                             | 37°38'59" N 6°12'27" W   |
| 56      | <i>Parentucellia viscosa</i> (L.) Caruel                                                     | 37°19'00.3"N 6°03'00.4"W |
| 57      | <i>Paronychia argentea</i> Lam.                                                              | 37°29'28" N 6°13'31" W   |
| 58      | <i>Petrorhagia nanteuilii</i> (Burnat) P.W.Ball & Heywood                                    | 37°41'11" N 6°18'58" W   |
| 59      | <i>Photinia glabra</i> (Thunb.) Poit.*                                                       | 37°25'24" N 5°59'33" W   |
| 60      | <i>Platanus hispanica</i> Mill. ex Münchh.*                                                  | 37°25'21" N 5°59'43" W   |
| 61      | <i>Platycapnos spicata</i> (L.) Bernh.                                                       | 37°21'45" N 6° 12'22" W  |
| 62      | <i>Plumbago europaea</i> L.                                                                  | 37°19'7" N 5°46'2" W     |
| 63-64   | <i>Rhamnus alaternus</i> L.                                                                  | 37°41'28" N 6°18'47" W   |
| 65      | <i>Rosa canina</i> L.                                                                        | 37°22'31"N 6°13'29" W    |
| 66      | <i>Rumex conglomeratus</i> Murray                                                            | 37°15'9" N 6°22'33" W    |
| 67      | <i>Schinus molle</i> L.                                                                      | 37°25'23" N 5°59'40" W   |
| 68      | <i>Scirpoides holoschoenus</i> (L.) Soják                                                    | 37°13'56" N 5°42'59" W   |
| 69      | <i>Scrophularia sambucifolia</i> L.                                                          | 37°18'16" N 5°43'44" W   |
| 70      | <i>Sedum amplexicaule</i> DC. subsp. <i>amplexicaule</i>                                     | 37°43'59" N 6°10'13" W   |
| 71      | <i>Sedum mucizonia</i> (Ortega) Raym.-Hamet                                                  | 37°41'16" N 6°18'58" W   |
| 72      | <i>Solandra maxima</i> (Moc. & Sessé ex Dunal) P.S.Green*                                    | 37°23'52" N 6° 0'17" W   |
| 73      | <i>Solanum nigrum</i> L.                                                                     | 37°34'6" N 6°3'14" W     |

| Extract | Plant name                                                        | Coordinates             |
|---------|-------------------------------------------------------------------|-------------------------|
| 74      | <i>Swietenia mahagoni</i> (L.) Jacq.*                             | 37°25'27" N 5°59'41" W  |
| 75      | <i>Syagrus romanzoffiana</i> (Cham.) Glassman*                    | 37° 25'20" N 5°59'41" W |
| 76      | <i>Taxodium distichum</i> (L.) Rich.*                             | 37° 25'28" N 5°59'40" W |
| 77      | <i>Thymbra capitata</i> (L.) Cav.                                 | 37°20'56" N 5°47'59" W  |
| 78      | <i>Tilia tomentosa</i> Moench.*                                   | 37°25'19" N 5° 59'35" W |
| 79      | <i>Trachycarpus fortunei</i> (Hook.) H.Wendl.*                    | 37°25'21" N 5°59'40" W  |
| 80      | <i>Verbena officinalis</i> L.                                     | 37°21' 10" N 5°45'8" W  |
| 81      | <i>Xiphion xiphium</i> (L.) M.B. Crespo, Mart.-Azorín & Mavrodiev | 37°17'9" N 6°23'21" W   |
| 82      | <i>Zelkova serrata</i> (Thunb.) Makino*                           | 37°25'20" N 5°59'33" W  |

Plants from cultures are marked with "\*" after the scientific name.

**Table S2.** The extraction yield (%) for each extract used in this work.

| Extract | Plant name                                                            | Part used                 | Extraction yield (%) |
|---------|-----------------------------------------------------------------------|---------------------------|----------------------|
| 1       | <i>Acoelorrhaphe wrightii</i> (Griseb. & H.Wendl.) H.Wendl. ex Becc.* | Leaf                      | 6.9                  |
| 2       | <i>Aegilops geniculata</i> Roth                                       | Whole plant               | 5.8                  |
| 3       | <i>Alkanna tinctoria</i> (L.) Tausch                                  | Aerial part with flowers  | 3.9                  |
| 4       | <i>Alyssum simplex</i> Rudolphi                                       | Whole plant               | 3.6                  |
| 5       | <i>Amaryllis belladonna</i> L.*                                       | Root                      | 0.4                  |
| 6       | <i>Arisarum simorrhinum</i> Durieu                                    | Aerial parts with flowers | 2.0                  |
| 7       | <i>Aristolochia paucinervis</i> Pomel                                 | Aerial part with flowers  | 5.6                  |
| 8       | <i>Arum italicum</i> Mill. subsp. <i>italicum</i>                     | Aerial parts              | 19.6                 |
| 9       | <i>Bartsia trixago</i> L.                                             | Aerial part with flowers  | 8.5                  |
| 10      | <i>Bolboschoenus maritimus</i> (L.) Palla                             | Aerial part with flowers  | 3.5                  |
| 11      | <i>Brachychiton populneus</i> R.Br.*                                  | Aerial parts with fruits  | 3.5                  |
| 12      | <i>Briza maxima</i> L.                                                | Aerial part               | 3.8                  |
| 13      | <i>Butia capitata</i> (Mart.) Becc.*                                  | Leaf                      | 1.8                  |
| 14      | <i>Catalpa bignonioides</i> Walter*                                   | Leaf                      | 8.9                  |
| 15      | <i>Ceiba speciosa</i> (A.St.-Hil.) Ravenna*                           | Aerial part               | 4.3                  |
| 16      | <i>Celtis australis</i> L.                                            | Fruits                    | 8.0                  |
| 17      | <i>Celtis australis</i> L.                                            | Aerial part               | 4.4                  |

| Extract | Plant name                                                                                   | Part used                 | Extraction yield (%) |
|---------|----------------------------------------------------------------------------------------------|---------------------------|----------------------|
| 18      | <i>Centranthus calcitrapae</i> (L.) Dufr.                                                    | Aerial part with flowers  | 7.2                  |
| 19      | <i>Cerinthe major</i> L.                                                                     | Aerial parts with flowers | 5.0                  |
| 20      | <i>Ceterach officinarum</i> Willd. subsp. <i>officinarum</i>                                 | Aerial parts              | 7.5                  |
| 21      | <i>Chamaerops humilis</i> L.                                                                 | Leaves                    | 5.6                  |
| 22      | <i>Chamaerops humilis</i> L.                                                                 | Fruits                    | 6.0                  |
| 23      | <i>Cuscuta campestris</i> Yunck.                                                             | Aerial part with flowers  | 4.3                  |
| 24      | <i>Dipcadi serotinum</i> (L.) Medik.                                                         | Whole plant               | 3.2                  |
| 25      | <i>Fedia cornucopiae</i> (L.) Gaertn.                                                        | Whole plant               | 3.6                  |
| 26      | <i>Firmiana simplex</i> (L.) W.Wight*                                                        | Leaf                      | 6.6                  |
| 27      | <i>Gynandris sisyrinchium</i> (L.) Parl.                                                     | Whole plant               | 3.3                  |
| 28      | <i>Gynandris sisyrinchium</i> (L.) Parl.                                                     | Flowers                   | 2.5                  |
| 29      | <i>Heliotropium europaeum</i> L.                                                             | Aerial part with flowers  | 1.4                  |
| 30      | <i>Iris germanica</i> L.                                                                     | Root                      | 3.2                  |
| 31      | <i>Jacaranda mimosifolia</i> D.Don*                                                          | Flowers                   | 8.9                  |
| 32      | <i>Jasminum fruticans</i> L.                                                                 | Fruits                    | 4.6                  |
| 33      | <i>Jasminum fruticans</i> L.                                                                 | Aerial parts              | 10.9                 |
| 34      | <i>Juncus acutus</i> L. subsp. <i>acutus</i>                                                 | Aerial part with fruits   | 1.7                  |
| 35      | <i>Juno planifolia</i> (Mill.) Asch.                                                         | Aerial parts with flowers | 3.4                  |
| 36      | <i>Koelreuteria paniculata</i> Laxm.*                                                        | Leaf                      | 5.5                  |
| 37      | <i>Lagerstroemia indica</i> L.*                                                              | Aerial part               | 4.1                  |
| 38      | <i>Lagerstroemia speciosa</i> (L.) Pers.*                                                    | Leaf                      | 4.5                  |
| 39      | <i>Lagunaria patersonia</i> (Andrews) G. Don*                                                | Leaf                      | 3.4                  |
| 40      | <i>Linaria viscosa</i> (L.) Chaz.                                                            | Aerial parts with flowers | 6.2                  |
| 41      | <i>Liquidambar styraciflua</i> L.*                                                           | Aerial part               | 6.7                  |
| 42      | <i>Lolium rigidum</i> Gaudin                                                                 | Aerial parts              | 4.5                  |
| 43      | <i>Lomelosia simplex</i> (Desf.) Raf. subsp. <i>dentata</i> (Jord. & Fourr.) Greuter & Burde | Aerial part with flowers  | 8.4                  |
| 44      | <i>Lonicera implexa</i> Aiton                                                                | Leaves                    | 10.2                 |
| 45      | <i>Maclura pomifera</i> (Raf.) C.K.Schneid.*                                                 | Aerial part               | 7.2                  |
| 46      | <i>Mandragora autumnalis</i> Bertol.                                                         | Flower and fruits         | 2.5                  |
| 47      | <i>Mandragora autumnalis</i> Bertol.                                                         | Whole plant               | 2.8                  |
| 48      | <i>Morus nigra</i> L.                                                                        | Fruits                    | 4.2                  |
| 49      | <i>Muscari comosum</i> (L.) Mill.                                                            | Aerial parts with flowers | 2.7                  |
| 50      | <i>Nonea vesicaria</i> (L.) Rchb.                                                            | Whole plant               | 5.6                  |
| 51      | <i>Oenothera rosea</i> L'Hér. ex Aiton*                                                      | Aerial parts with flowers | 5.2                  |
| 52      | <i>Ophrys scolopax</i> Cav.                                                                  | Aerial part with flowers  | 7.5                  |
| 53      | <i>Ophrys speculum</i> Link                                                                  | Whole plant               | 2.8                  |
| 54      | <i>Ornithogalum baeticum</i> Boiss.*                                                         | Whole plant               | 1.3                  |
| 55      | <i>Orobanche crenata</i> Forssk.                                                             | Aerial parts with flowers | 4.1                  |
| 56      | <i>Parentucellia viscosa</i> (L.) Caruel                                                     | Aerial part with flowers  | 3.3                  |

| Extract | Plant name                                                        | Part used                           | Extraction yield (%) |
|---------|-------------------------------------------------------------------|-------------------------------------|----------------------|
| 57      | <i>Paronychia argentea</i> Lam.                                   | Whole plant                         | 4.7                  |
| 58      | <i>Petrorhagia nanteuillii</i> (Burnat) P.W.Ball & Heywood        | Aerial part with flowers            | 2.7                  |
| 59      | <i>Photinia glabra</i> (Thunb.) Poit.*                            | Aerial part                         | 9.8                  |
| 60      | <i>Platanus hispanica</i> Mill. ex Münchh.*                       | Leaf                                | 5.7                  |
| 61      | <i>Platycapnos spicata</i> (L.) Bernh.                            | Aerial parts with flowers           | 6.3                  |
| 62      | <i>Plumbago europaea</i> L.                                       | Aerial part with flowers and fruits | 3.9                  |
| 63      | <i>Rhamnus alaternus</i> L.                                       | Leaves                              | 5.9                  |
| 64      | <i>Rhamnus alaternus</i> L.                                       | Fruits                              | 3.8                  |
| 65      | <i>Rosa canina</i> L.                                             | Fruits                              | 6.7                  |
| 66      | <i>Rumex conglomeratus</i> Murray                                 | Aerial part with flowers            | 5.2                  |
| 67      | <i>Schinus molle</i> L.                                           | Aerial part                         | 6.2                  |
| 68      | <i>Scirpoides holoschoenus</i> (L.) Soják                         | Aerial part with fruits             | 1.8                  |
| 69      | <i>Scrophularia sambucifolia</i> L.                               | Aerial part with flowers            | 5.0                  |
| 70      | <i>Sedum amplexicaule</i> DC. subsp. <i>amplexicaule</i>          | Whole plant                         | 2.3                  |
| 71      | <i>Sedum mucizonia</i> (Ortega) Raym.-Hamet                       | Whole plant                         | 2.8                  |
| 72      | <i>Solandra maxima</i> (Moc. & Sessé ex Dunal) P.S.Green*         | Leaves                              | 2.9                  |
| 73      | <i>Solanum nigrum</i> L.                                          | Aerial parts                        | 31.9                 |
| 74      | <i>Swietenia mahagoni</i> (L.) Jacq.*                             | Leaf                                | 6.3                  |
| 75      | <i>Syagrus romanzoffiana</i> (Cham.) Glassman*                    | Aerial part                         | 6.1                  |
| 76      | <i>Taxodium distichum</i> (L.) Rich.*                             | Aerial part                         | 8.4                  |
| 77      | <i>Thymbra capitata</i> (L.) Cav.                                 | Aerial part with flowers            | 0.7                  |
| 78      | <i>Tilia tomentosa</i> Moench.*                                   | Leaf                                | 2.5                  |
| 79      | <i>Trachycarpus fortunei</i> (Hook.) H.Wendl.*                    | Leaf                                | 6.5                  |
| 80      | <i>Verbena officinalis</i> L.                                     | Aerial part with flowers            | 3.7                  |
| 81      | <i>Xiphion xiphium</i> (L.) M.B. Crespo, Mart.-Azorín & Mavrodiev | Flowers                             | 1.4                  |
| 82      | <i>Zelkova serrata</i> (Thunb.) Makino*                           | Aerial part                         | 1.9                  |

Plants from cultures are marked with "\*" after the scientific name.

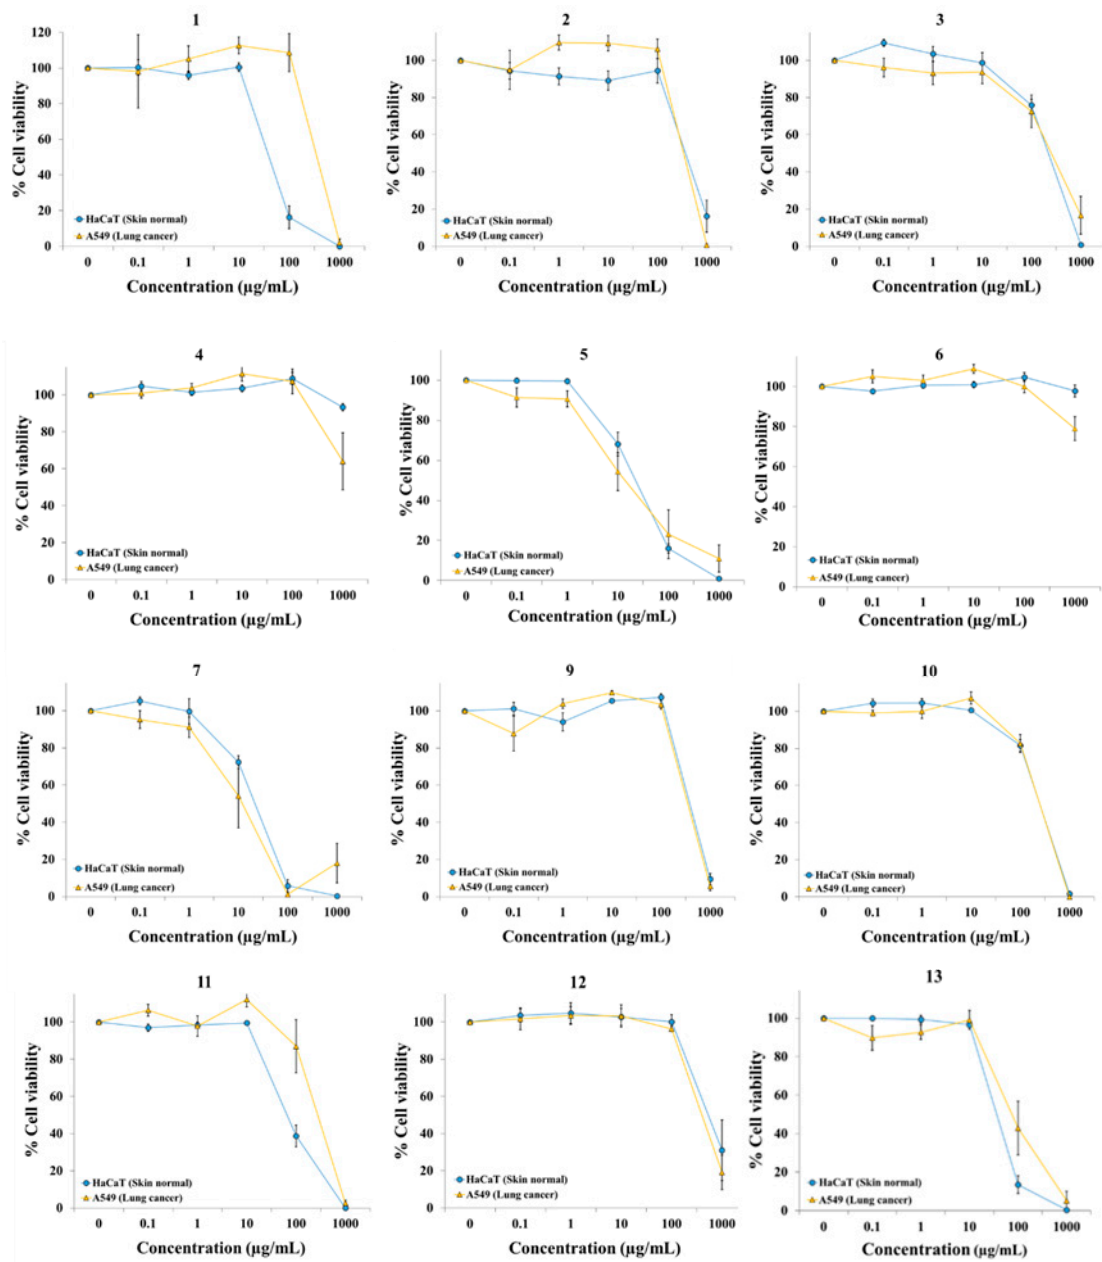

**Figure S1.** Evaluation of selective cytotoxic activity of plant extracts 1–7, 9–13 on A549 lung cancer cells and HaCaT non-malignant cells. The cells were exposed for 72 h to the extracts and cell viability was determined with the resazurin assay.

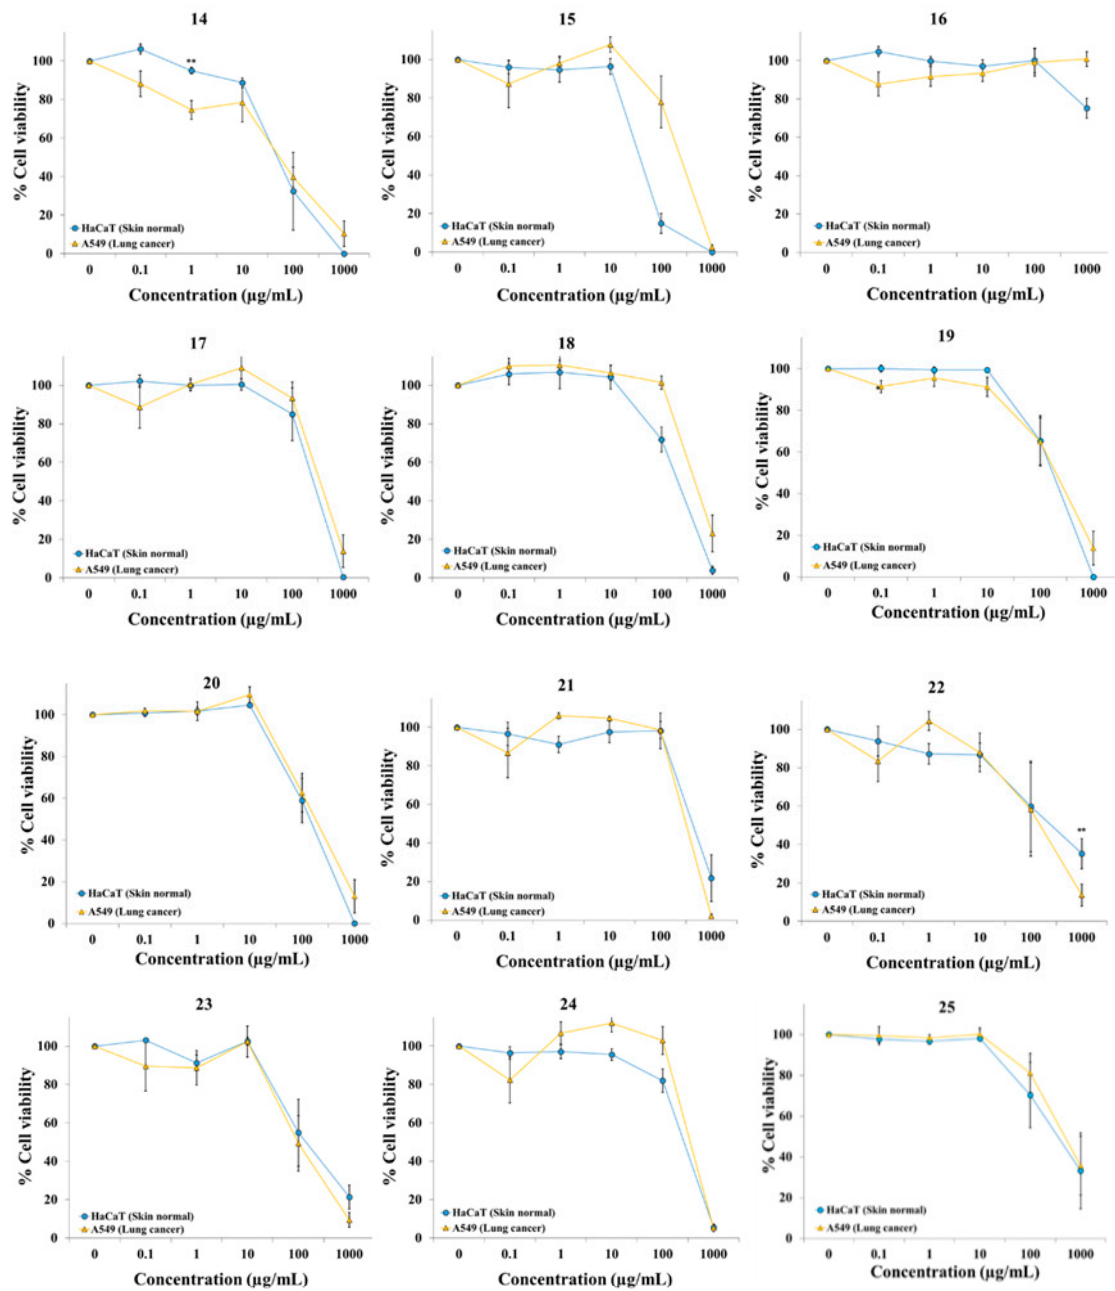

**Figure S2.** Evaluation of selective cytotoxic activity of plant extracts 14-25 on A549 lung cancer cells and HaCaT non-malignant cells. The cells were exposed for 72 h to the extracts and cell viability was determined with the resazurin assay.

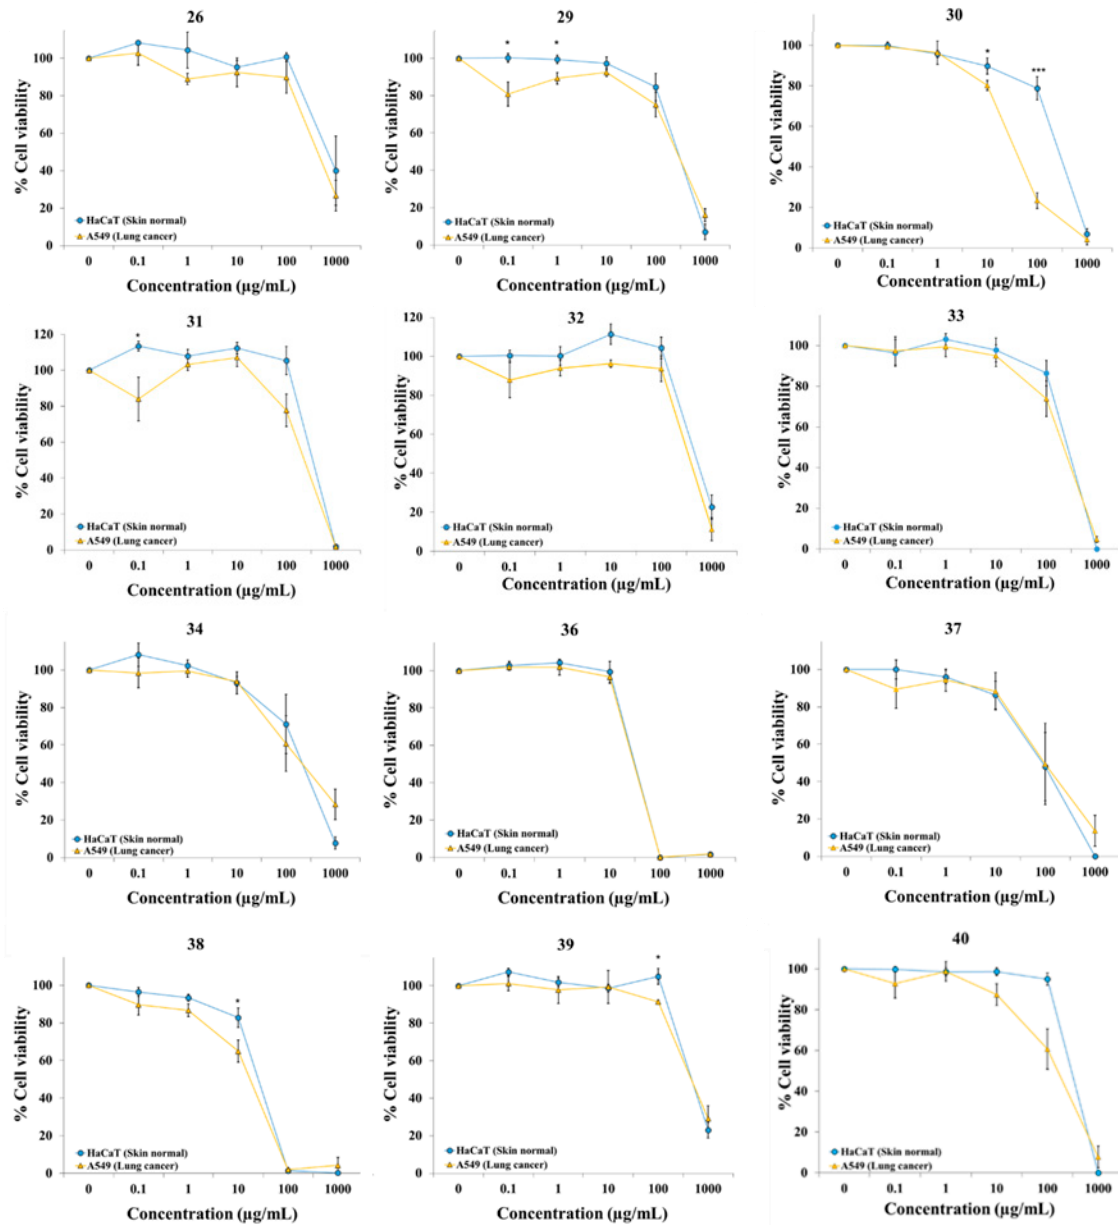

**Figure S3.** Evaluation of selective cytotoxic activity of plant extracts 26, 29-34, 36-40 on A549 lung cancer cells and HaCaT non-malignant cells. The cells were exposed for 72 h to the extracts and cell viability was determined with the resazurin assay.



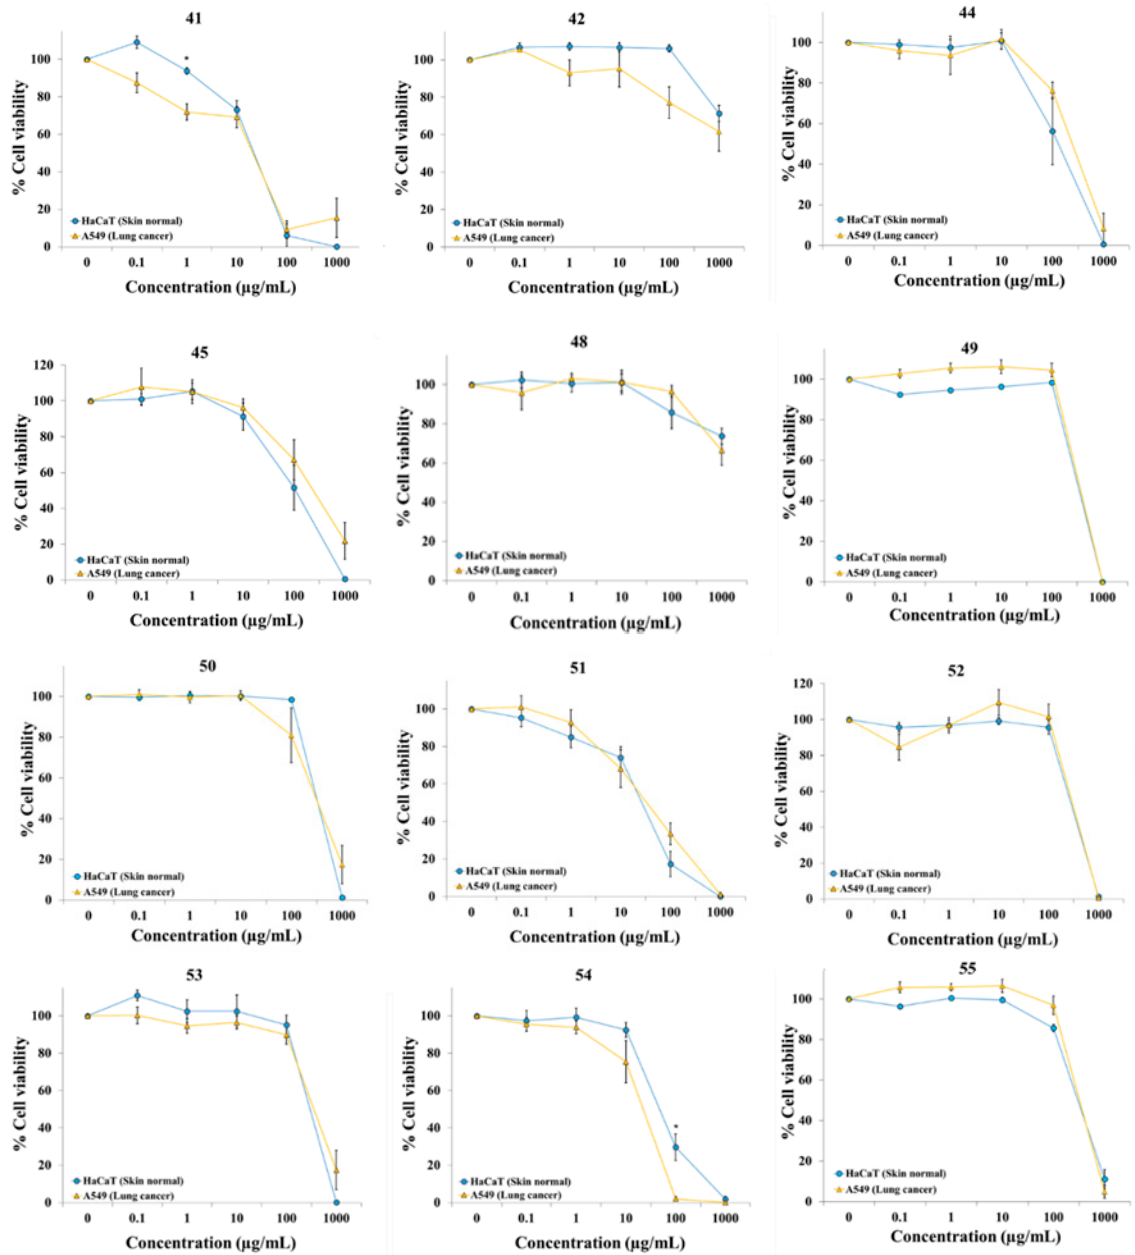

**Figure S4.** Evaluation of selective cytotoxic activity of plant extracts 41, 42, 44, 45, 48-55 on A549 lung cancer cells and HaCaT non-malignant cells. The cells were exposed for 72 h to the extracts and cell viability was determined with the resazurin assay.

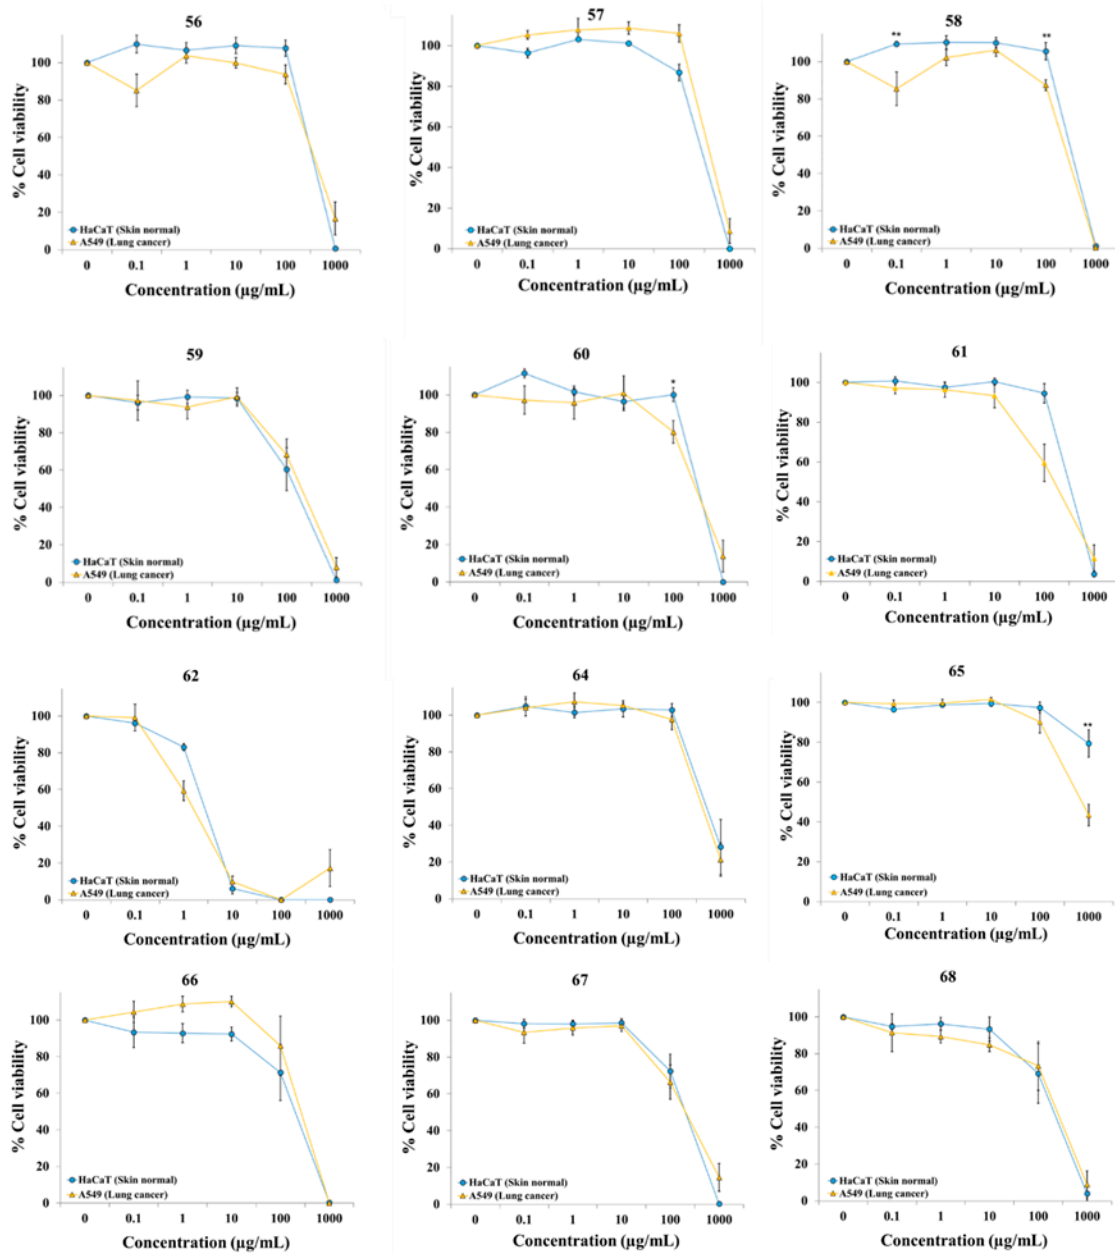

**Figure S5.** Evaluation of selective cytotoxic activity of plant extracts 56-62, 64-68 on A549 lung cancer cells and HaCaT non-malignant cells. The cells were exposed for 72 h to the extracts and cell viability was determined with the resazurin assay.

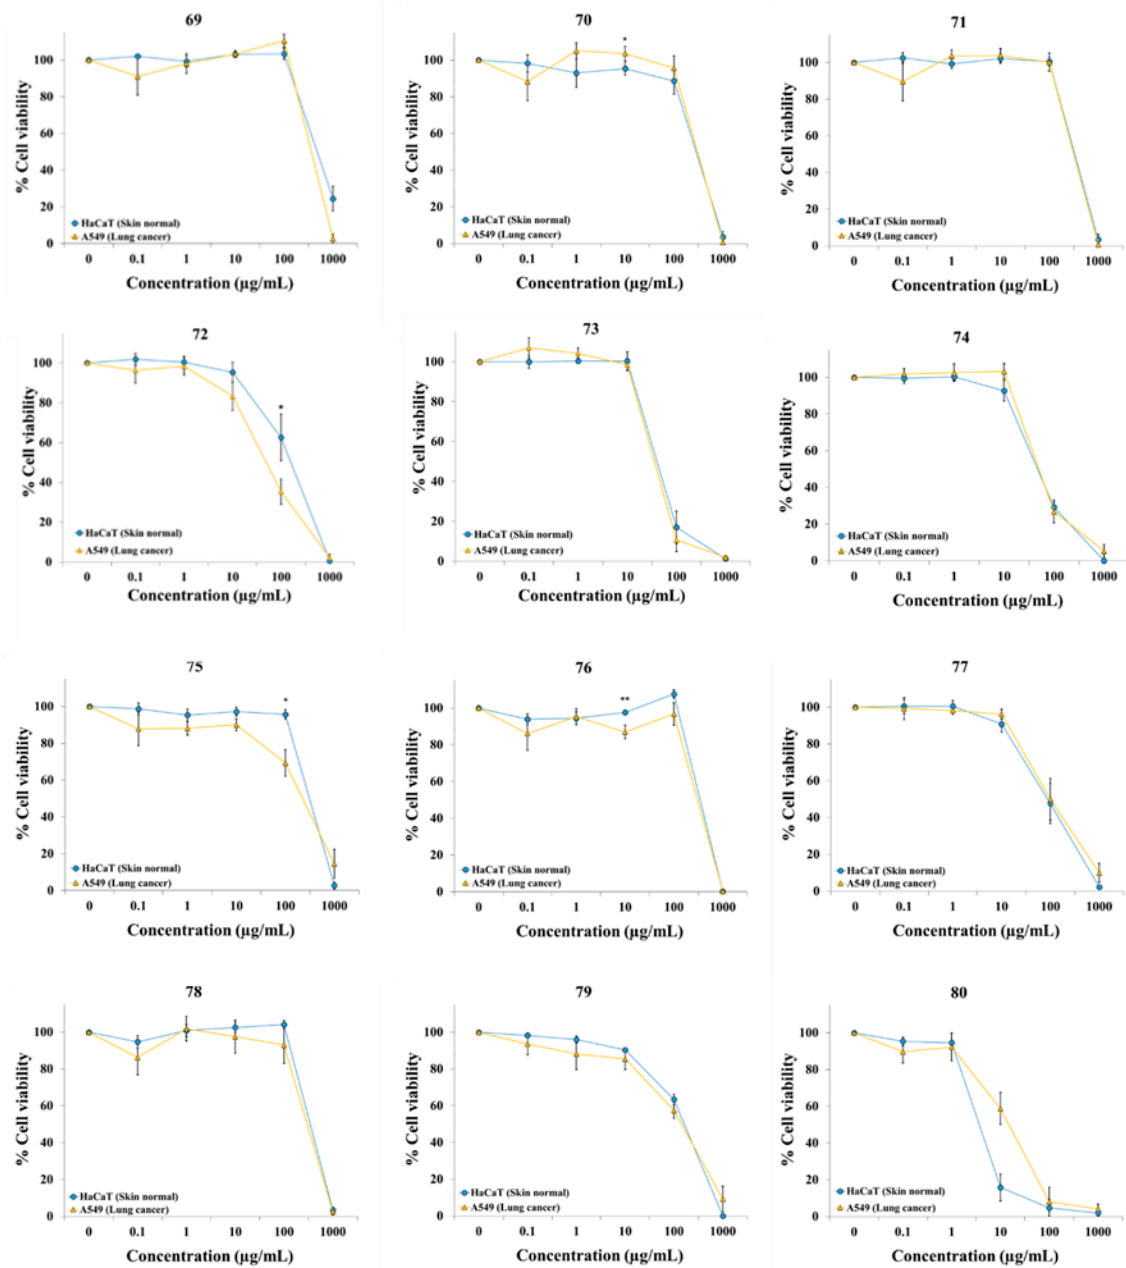

**Figure S6.** Evaluation of selective cytotoxic activity of plant extracts 69-80 on A549 lung cancer cells and HaCaT non-malignant cells. The cells were exposed for 72 h to the extracts and cell viability was determined with the resazurin assay.

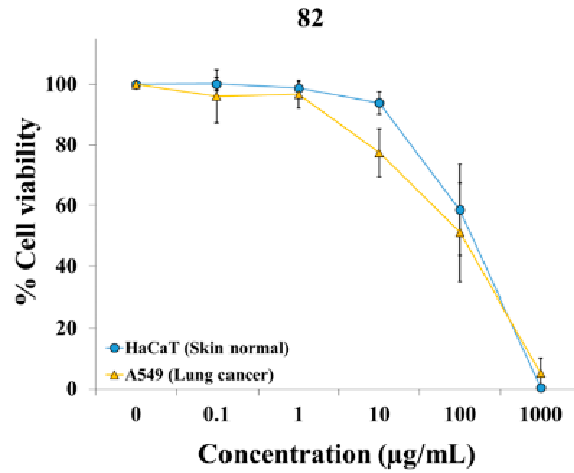

**Figure S7.** Evaluation of selective cytotoxic activity of plant extract 82 on A549 lung cancer cells and HaCaT non-malignant cells. The cells were exposed for 72 h to the extracts and cell viability was determined with the resazurin assay.

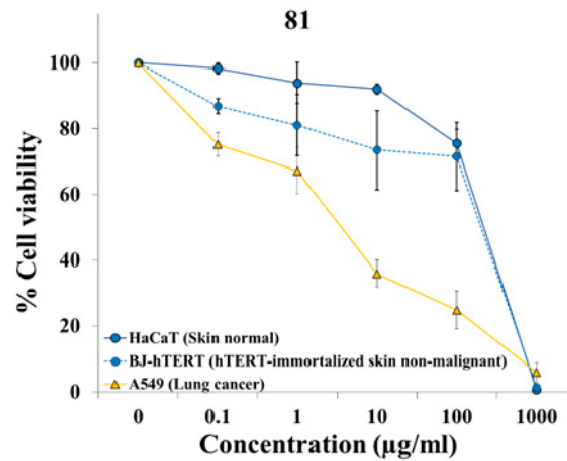

**Figure S8.** Evaluation of selective cytotoxic activity of plant extract 81 on A549 lung cancer cells, HaCaT non-malignant cells and BJ-hTERT non-malignant cells. The cells were exposed for 72 h to the extracts and cell viability was determined with the resazurin assay. Data represent mean  $\pm$  SEM from at least two independent experiments.
